# Supplementary material for: Breeding-assisted genomics: Applying meta-GWAS for milling and baking quality in CIMMYT wheat breeding program
Source: PubMed Central journal article supplement (PMC6264898; doi:10.1371/journal.pone.0204757), 2018-11-29
Supplement: pone.0204757.s005.pdf [file pone.0204757.s005.pdf]

1 **Supp. Table 2: Significant Meta-GWAS SNPs**

| Marker ID         | IWGSC     | IWGSC     | POPSEQ | POPSEQ | Trait  | Overall | Overall | Overall       |
|-------------------|-----------|-----------|--------|--------|--------|---------|---------|---------------|
|                   | 2.25 Chr. | 2.25 bp   | Chr.   | cM     |        | Effect  | SE      | -Log10 (pFDR) |
| Loci_S1_1246860   | 1A        | 1246860   | 1A     | 1.79   | ALVW   | -8.06   | 1.66    | 3.71          |
| Loci_S1_245341120 | 1A        | 245341120 | 1A     | 165.46 | ALVPL  | -0.03   | 0.01    | 3.08          |
| Loci_S2_2532201   | 1B        | 2532201   |        |        | ALVW   | -15.20  | 1.73    | 15.32         |
| Loci_S2_247110912 | 1B        | 247110912 |        |        | ALVW   | -11.44  | 2.47    | 3.33          |
| Loci_S2_258464672 | 1B        | 258464672 | 1B     | 93.52  | LOFVOL | -5.84   | 1.23    | 3.51          |
| Loci_S2_266250969 | 1B        | 266250969 | 1B     | 97.83  | ALVW   | 9.99    | 1.26    | 12.08         |
| Loci_S2_276759258 | 1B        | 276759258 | 1B     | 111.09 | ALVPL  | -0.05   | 0.01    | 5.36          |
| Loci_S2_282749164 | 1B        | 282749164 | 1B     | 125.88 | ALVPL  | 0.11    | 0.01    | 28.93         |
| Loci_S2_282749164 | 1B        | 282749164 | 1B     | 125.88 | LOFVOL | -6.90   | 1.06    | 7.36          |
| Loci_S2_282801547 | 1B        | 282801547 | 1B     | 125.88 | ALVPL  | 0.05    | 0.01    | 5.16          |
| Loci_S3_108397610 | 1D        | 108397610 | 1D     | 73.3   | ALVW   | 48.27   | 2.61    | 29.46         |
| Loci_S3_108397610 | 1D        | 108397610 | 1D     | 73.3   | ALVPL  | 0.07    | 0.01    | 4.68          |
| Loci_S3_113356875 | 1D        | 113356875 | 1D     | 73.3   | ALVW   | 46.16   | 2.57    | 29.46         |
| Loci_S3_113356875 | 1D        | 113356875 | 1D     | 73.3   | ALVPL  | 0.07    | 0.01    | 5.33          |
| Loci_S3_134641057 | 1D        | 134641057 | 1D     | 154.66 | ALVPL  | -0.04   | 0.01    | 4.71          |
| Loci_S4_253161415 | 2A        | 253161415 | 2A     | 120.3  | LOFVOL | -7.04   | 1.49    | 3.50          |
| Loci_S7_70434692  | 3A        | 70434692  | 3A     | 60.62  | LOFVOL | -7.36   | 1.49    | 3.87          |
| Loci_S8_511291591 | 3B        | 511291591 |        |        | TKW    | 0.72    | 0.14    | 3.67          |

|                    |    |           |    |        |        |        |      |       |
|--------------------|----|-----------|----|--------|--------|--------|------|-------|
| Loci_S8_652811064  | 3B | 652811064 | 3B | 79.46  | GRNPRO | 0.06   | 0.01 | 3.01  |
| Loci_S9_50810552   | 3D | 50810552  | 3D | 71.95  | ALVW   | -7.55  | 1.44 | 4.42  |
| Loci_S9_50810552   | 3D | 50810552  | 3D | 71.95  | GRNPRO | -0.06  | 0.01 | 3.02  |
| Loci_S10_201716835 | 4A | 201716835 | 4A | 105.75 | ALVW   | 11.46  | 2.30 | 3.92  |
| Loci_S10_202066152 | 4A | 202066152 | 4A | 107.52 | ALVW   | 11.38  | 2.50 | 3.27  |
| Loci_S10_203231427 | 4A | 203231427 | 4A | 107.52 | ALVW   | -11.26 | 2.45 | 3.33  |
| Loci_S11_9212182   | 4B | 9212182   | 4B | 44.35  | ALVPL  | -0.04  | 0.01 | 4.23  |
| Loci_S11_9212182   | 4B | 9212182   | 4B | 44.35  | GRNPRO | -0.06  | 0.01 | 3.01  |
| Loci_S11_9791147   | 4B | 9791147   | 4B | 44.35  | ALVW   | -14.31 | 2.30 | 6.88  |
| Loci_S13_77029577  | 5A | 77029577  | 5A | 8.82   | ALVW   | 7.99   | 1.63 | 3.76  |
| Loci_S13_82914716  | 5A | 82914716  |    |        | ALVW   | -7.06  | 1.57 | 3.20  |
| Loci_S16_19072856  | 6A | 19072856  | 6A | 49.22  | GRNPRO | -0.12  | 0.01 | 11.90 |
| Loci_S16_19072856  | 6A | 19072856  | 6A | 49.22  | LOFVOL | -7.86  | 1.28 | 6.62  |
| Loci_S16_24998762  | 6A | 24998762  | 6A | 49.22  | GRNPRO | -0.13  | 0.02 | 13.16 |
| Loci_S16_24998762  | 6A | 24998762  | 6A | 49.22  | LOFVOL | -7.70  | 1.40 | 5.15  |
| Loci_S16_33226117  | 6A | 33226117  | 6A | 53.81  | GRNPRO | -0.16  | 0.02 | 22.63 |
| Loci_S16_33226117  | 6A | 33226117  | 6A | 53.81  | LOFVOL | -9.80  | 1.37 | 8.96  |
| Loci_S16_33226117  | 6A | 33226117  | 6A | 53.81  | ALVW   | -8.72  | 1.97 | 3.11  |
| Loci_S16_143466155 | 6A | 143466155 | 6A | 60.96  | GRNPRO | 0.07   | 0.02 | 3.01  |
| Loci_S16_150663555 | 6A | 150663555 | 6A | 63.1   | LOFVOL | 10.73  | 2.31 | 3.36  |
| Loci_S16_150663555 | 6A | 150663555 | 6A | 63.1   | GRNPRO | 0.12   | 0.03 | 3.21  |
| Loci_S17_5974923   | 6B | 5974923   | 6B | 22.38  | ALVPL  | -0.08  | 0.01 | 9.55  |

|                    |    |           |    |        |        |       |      |       |
|--------------------|----|-----------|----|--------|--------|-------|------|-------|
| Loci_S17_6513799   | 6B | 6513799   | 6B | 22.38  | ALVPL  | -0.07 | 0.01 | 8.45  |
| Loci_S17_164481606 | 6B | 164481606 | 6B | 78.42  | GRNPRO | 0.08  | 0.02 | 3.01  |
| Loci_S18_20387611  | 6D | 20387611  | 6D | 77.64  | TKW    | 0.59  | 0.08 | 10.63 |
| Loci_S18_111388404 | 6D | 111388404 | 6D | 81.58  | TKW    | 0.51  | 0.08 | 7.20  |
| Loci_S18_111388404 | 6D | 111388404 | 6D | 81.58  | ALVW   | 6.79  | 1.47 | 3.33  |
| Loci_S19_78415889  | 7A | 78415889  |    |        | LOFVOL | -7.59 | 1.25 | 6.55  |
| Loci_S19_101352522 | 7A | 101352522 | 7A | 93.26  | LOFVOL | -7.64 | 1.25 | 6.62  |
| Loci_S19_112027332 | 7A | 112027332 | 7A | 93.26  | LOFVOL | -8.15 | 1.30 | 6.74  |
| Loci_S20_173057509 | 7B | 173057509 | 7B | 79.65  | ALVPL  | -0.04 | 0.01 | 3.08  |
| Loci_S20_251235369 | 7B | 251235369 | 7B | 172.71 | ALVW   | 7.36  | 1.60 | 3.33  |
| Loci_S20_251235369 | 7B | 251235369 | 7B | 172.71 | GRNPRO | -0.06 | 0.01 | 3.01  |
| Loci_S21_55673430  | 7D | 55673430  | 7D | 111.08 | TKW    | -0.48 | 0.10 | 3.38  |

2

3 Marker ID is the GBS SNP name in this study. Chromosome and position are listed as identified by Bowtie 2<sup>36</sup> aligned to IWGSC  
4 2.25. POPSEQ chromosome and position are from markers which aligned to the Chapman, et al.<sup>37</sup> population. Trait is the phenotypic  
5 trait of interest. Significant effect and standard error of the effect are listed along with the negative log10 probability of the significant  
6 marker-trait association corrected with False Discovery Rate.

7

8

9
