# Supplementary material for: Breeding-assisted genomics: Applying meta-GWAS for milling and baking quality in CIMMYT wheat breeding program
Source: PubMed Central journal article supplement (PMC6264898; doi:10.1371/journal.pone.0204757), 2018-11-29
Supplement: pone.0204757.s006.pdf [file pone.0204757.s006.pdf]

1 **Supp Table 3: Haplotype effects and standard errors**

| Chromosome & position | Composite Frequency | TKW (g)  |      | GRNPRO (% content) |      | ALVW (J)  |      | ALVPL    |      | LOFVOL (cm <sup>3</sup> ) |      |
|-----------------------|---------------------|----------|------|--------------------|------|-----------|------|----------|------|---------------------------|------|
|                       |                     | Effect   | SE   | Effect             | SE   | Effect    | SE   | Effect   | SE   | Effect                    | SE   |
| 1D - 73.3 cM          | 8.8%                | 1.08***  | 0.23 | 0.01               | 0.04 | -86.44*** | 4.82 | -0.07*** | 0.02 | -13.43***                 | 3.44 |
|                       | 89.9%               | -1.02*** | 0.22 | -0.03              | 0.03 | 79.25***  | 4.42 | 0.06**   | 0.02 | 11.90***                  | 3.17 |
| 4A - 106-108 cM       | 42.9%               | -1.16*** | 0.14 | 0.14***            | 0.02 | -1.65     | 2.54 | -0.07*** | 0.01 | 20.04***                  | 1.82 |
|                       | 50.0%               | 1.08***  | 0.14 | -0.15***           | 0.02 | 3.55      | 2.55 | 0.08***  | 0.01 | -19.07***                 | 1.84 |
| 6A - 49-54 cM         | 19.9%               | -1.27*** | 0.18 | 0.29***            | 0.03 | -11.04*** | 3.22 | -0.09*** | 0.01 | 22.54***                  | 2.25 |
|                       | 65.3%               | 1.12***  | 0.14 | -0.23***           | 0.02 | 3.29      | 2.65 | 0.07***  | 0.01 | -19.83***                 | 1.88 |
| 6A - 61-63 cM         | 44.4%               | -0.88*** | 0.15 | 0.15***            | 0.02 | -6.76     | 2.71 | -0.05*** | 0.01 | 15.21***                  | 1.96 |
|                       | 44.9%               | 1.03***  | 0.15 | -0.19***           | 0.02 | 2.74      | 2.64 | 0.06***  | 0.01 | -17.84***                 | 1.91 |
| 6B - 22.4 cM          | 15.5%               | -0.58**  | 0.20 | -0.13***           | 0.03 | -29.57*** | 3.38 | 0.00     | 0.02 | 5.27*                     | 2.44 |
|                       | 83.0%               | 0.58**   | 0.19 | 0.14***            | 0.03 | 26.93***  | 3.25 | 0.00     | 0.02 | -4.91*                    | 2.34 |
| 6D - 78-82 cM         | 34.4%               | -1.88*** | 0.14 | 0.07***            | 0.02 | -17.31*** | 2.66 | -0.08*** | 0.01 | 7.69***                   | 1.94 |
|                       | 49.2%               | 1.83***  | 0.14 | -0.06**            | 0.02 | 14.52***  | 2.52 | 0.06***  | 0.01 | -7.00***                  | 1.86 |
| 7A - 93.3 cM          | 34.0%               | -0.35*   | 0.15 | -0.01              | 0.02 | -5.03     | 2.62 | -0.08*** | 0.01 | 15.33***                  | 1.91 |
|                       | 55.3%               | 0.13     | 0.14 | -0.04              | 0.02 | 3.77      | 2.52 | 0.06***  | 0.01 | -12.59***                 | 1.83 |

2

3 Significance levels: \*\*\*  $p < 0.001$ ; \*\*  $p < 0.01$ ; \*  $p < 0.05$

4

5
